# Supplementary material
Source: PubMed Central journal article supplement (PMC6624651)
Supplement: NIHMS1531451-supplement-4.pdf [file NIHMS1531451-supplement-4.pdf]

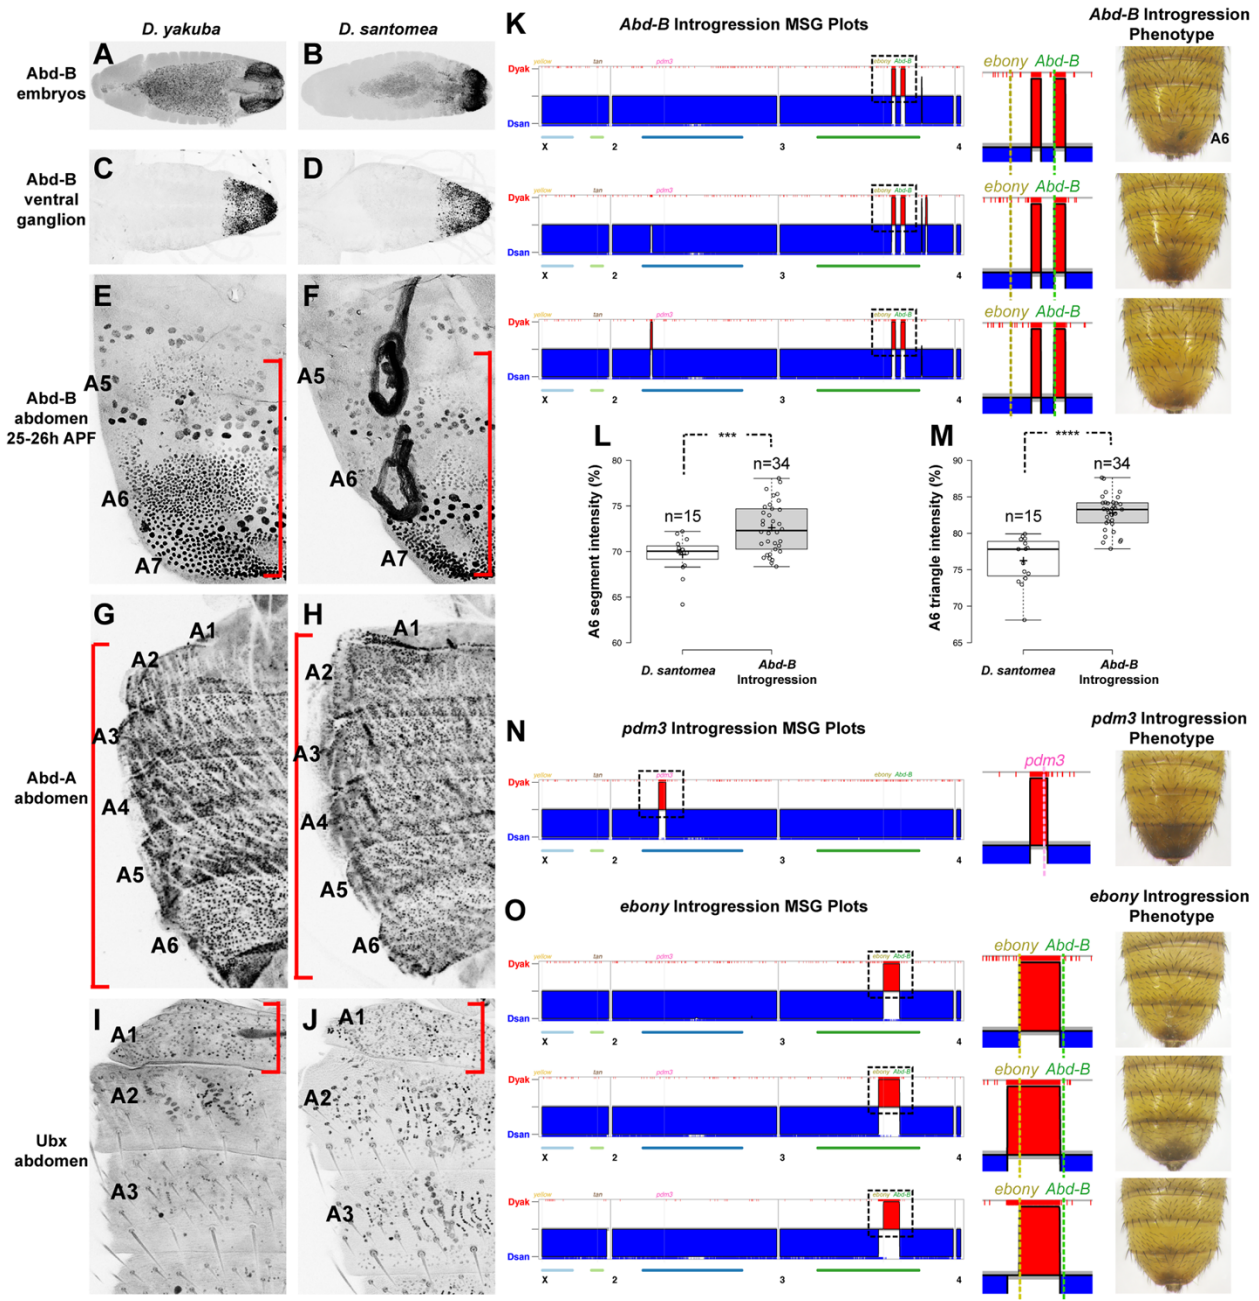

**Figure S1. Expression analysis of the Hox genes of the bithorax complex, introgression line maps and phenotypes. Related to Figure 1.** (A-F) *Abd-B* is detected in similar spatial patterns in *D. yakuba* and *D. santomea* late stage embryos (stage 12-13) (A-B), third instar larval brain (C-D), and early pupal abdomens (25-26 hAPF) (E-F). (G-H) *Abd-A* is expressed similarly between *D. yakuba* and *D. santomea* throughout the mid-late pupal stage abdomen (~68 hAPF). (I-J) *Ubx* is limited to epithelial nuclei of the A1 abdominal segment in mid-late stage pupae (~68 hAPF) of both *D. yakuba* and *D. santomea*. Red brackets highlight the expressing segments in pupal stages. (K-O) display multiplex shotgun genotype maps [S1] of each introgression line and their corresponding abdominal phenotypes. Plots show multiplex shotgun genotyping results for representative individuals, indicating homozygous *D. santomea* regions in blue, homozygous *D. yakuba* regions in red, and heterozygous regions in white. The positions of genes studied here and the previously mapped QTL [S2] are indicated on each map. (K) The *Abd-B* introgression line is consistently homozygous for two segments, one of which contains the *D. yakuba Abd-B* gene. Individuals from the line contain a variable number of other heterozygous fragments. Dashed box indicates the region of the plot that is zoomed in to the right. A representative adult image is shown beside each map. (L) Box plot showing the average A6 pigmentation of animals containing the homozygous *Abd-B* introgression (and a variable number of other homozygous and heterozygous fragments). (M) Box plot showing the intensity of pigmentation in a small posterior triangular region of the A6 tergite of animals containing the homozygous *Abd-B* introgression (and a variable number of other homozygous and heterozygous fragments). The number of stars in box plots indicates *p* value: \*\*\*\*:  $p < 0.0001$ , \*\*\*:  $p < 0.001$ , Student's *t*-test. (N) Genome map and representative phenotype of the *pdm3* introgression. (O) Genome maps and representative phenotypes of the *ebony* introgression line.

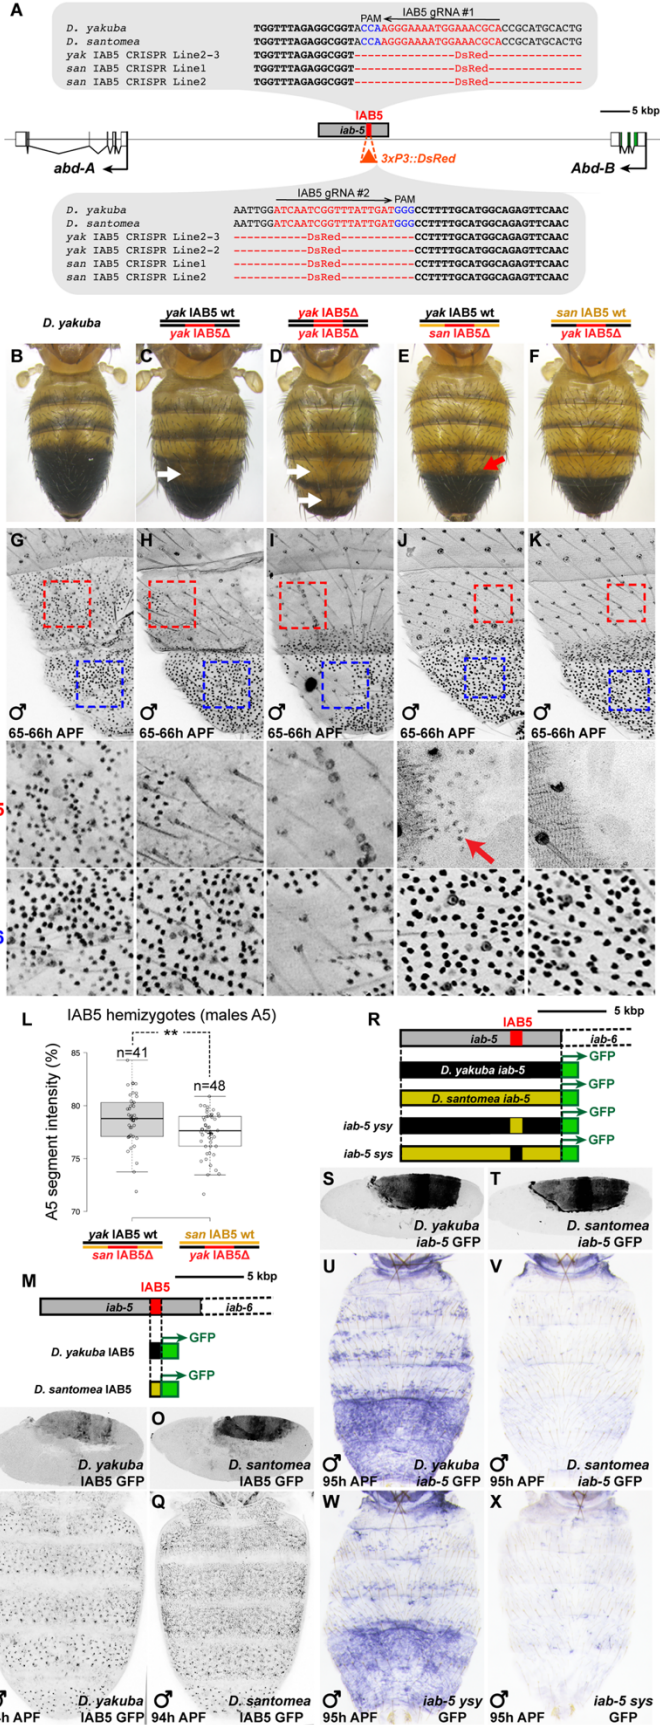

**Figure S2. Analysis of the abdominal pigment patterning function of the *iab-5* region.**

**Related to Figure 2.** (A) Schematic of the *Abd-B* locus displaying sequence confirmation of IAB $\Delta$  lines. (B-D) Phenotypic comparison among wild type *D. yakuba* (B), IAB5 $\Delta$  heterozygote *D. yakuba* (C) and IAB5 $\Delta$  homozygote *D. yakuba* male flies (D). Phenotypically, replacement of IAB5 with an RFP cassette generated consistent defects in the A5 segment of heterozygotes of *D. yakuba* (C). In *D. yakuba* homozygotes, pigmentation was nearly absent in the A5 segment, and sometimes defective in the A6 segment (D). White arrows in (C) and (D) indicate segments with reduced pigmentation. (E, F) Reciprocal hemizygotes containing a wildtype copy of IAB5 from *D. yakuba* (E) or *D. santomea* (F). Red arrow in (E) indicates the gain of pigmentation in the A5 segment compared to (F). (G-K) Antibody staining of Abd-B in each of the genotypes listed in (B-F) at mid-late pupal stages (65-66 hAPF). Middle and bottom panels show the magnified regions outlined in the top panels by red and blue dashed lines in A5 and A6, respectively. In IAB5 $\Delta$  heterozygotes (H), we see weak or sporadic expression of Abd-B in the A5 segments of pupae. In IAB5 $\Delta$  homozygotes (I), A5 expression is absent, and some defects in Abd-B expression manifest in A6 segments. Red arrow in (J, middle panel) indicates sporadic expression of Abd-B in the A5 segment of a hemizygote bearing a wildtype copy of the *D. yakuba* IAB5 element. (L) Quantification of the pigment intensity of the A5 segment of IAB5 $\Delta$  reciprocal hemizygote male progeny (Student's t-test, \*\*:  $p < 0.01$ ). This plot contains measurements of the same samples from Figure 2C (plot of A5 pigment area) quantified by an alternate method. (M) Schematic of the 15 kb *iab-5* region, showing the 1kb IAB5 initiator element, which was cloned from *D. yakuba* and *D. santomea* into GFP reporter constructs. (N-Q) IAB5 GFP reporter constructs from *D. yakuba* and *D. santomea*, showing activity in stage 9 embryos (N, O) and late stage (94 hAPF) pupal abdomens (P, Q). (P, Q) Reporter constructs containing only the IAB5 initiator elements from each species showed only low levels of expression in pupal stages. (R) Schematic of the entire 15kb *iab-5* regulatory region GFP reporter constructs from *D. yakuba* and *D. santomea* and the chimeric constructs of the *D. yakuba iab-5* region, with the initiator element IAB5 replaced by *D. santomea (iab-5 ysy)*, and its reciprocal construct (*iab-5 sys*). (S, T) The activities of *D. yakuba* and *D. santomea* whole *iab-5* regulatory regions in stage 9 embryos. (U-X) *in situ* hybridization of GFP mRNA in *iab-5* GFP reporter transgenic late pupal abdomens (95 hAPF).

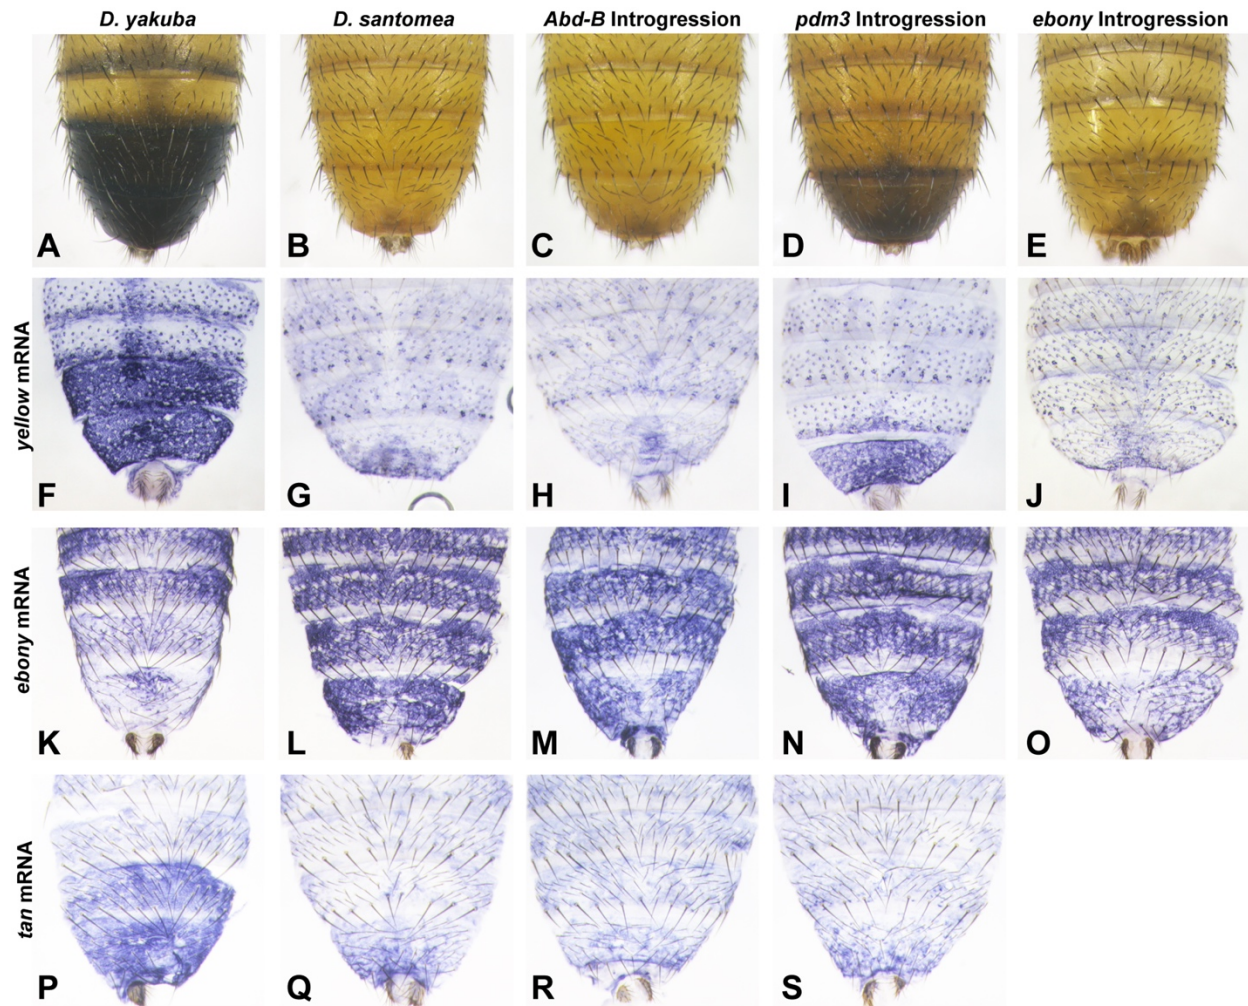

**Figure S3. Effects of introgression lines on *yellow*, *ebony* and *tan* expression. Related to Figure 3.** (A-E) Phenotypes of *D. yakuba* (A), *D. santomea* (B) the *Abd-B* introgression (C), *pdm3* introgression (D), and *ebony* introgression (E). (F-J) Expression patterns of *yellow* in mid-late pupae. (K-O) Expression patterns of *ebony* at eclosion. (P-S) Expression of *tan* in late stage pupae. The background for each abdomen is labeled at the top of the figure.

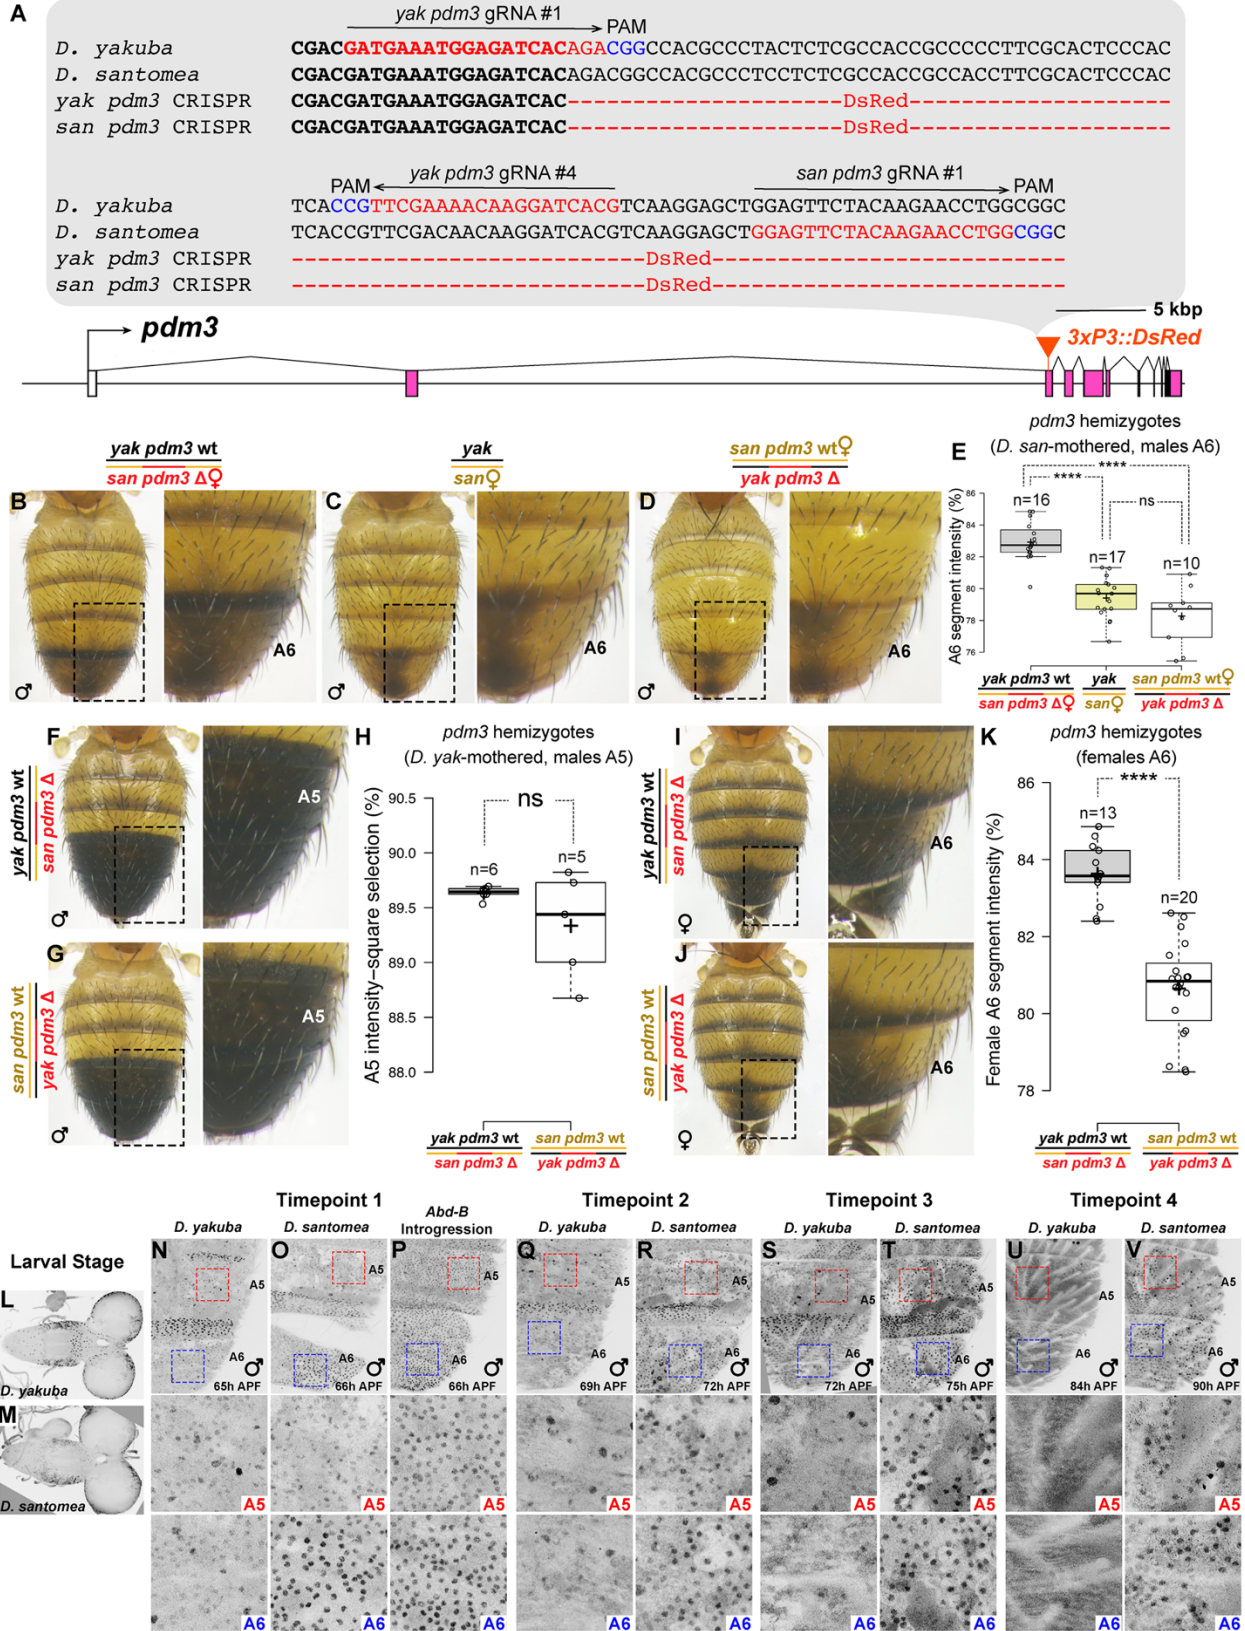

**Figure S4. Enhanced suppression of pigmentation by *pdm3* in *D. santomea*. Related to Figure 4.** (A) Schematic of the *pdm3* locus. The orange triangle indicates the position of a *3xP3::DsRed* cassette that replaced a portion of the second coding exon of *pdm3* to generate a null mutation. Sequence confirmation of the insertion is presented in the alignment. (B-E) Phenotypes of male hybrids from the *D. santomea*-mothered *pdm3* reciprocal hemizyosity test crosses. (B) *D. santomea*-mothered hybrid bearing a wildtype *D. yakuba pdm3* allele. (C) Wild-type *D. santomea*-mothered hybrid. (D) *D. santomea*-mothered hybrid bearing a wildtype *D. santomea pdm3* allele. (E) Quantification of A6 pigmentation in genotypes shown in (B-D). The plot in (E) is identical to Figure 4A, but additionally shows quantification of the *D. santomea*-mothered hybrid phenotype. (F-H) Phenotypes of male hybrids from the *D. yakuba*-mothered *pdm3* reciprocal hemizyosity test crosses. (F) *D. yakuba*-mothered hybrid male bearing a wildtype *D. yakuba pdm3* allele. (G) *D. yakuba*-mothered hybrid male bearing a wildtype *D. santomea pdm3* allele. (H) Quantification of A5 pigmentation phenotype. (I-K) Phenotypes of female hybrids from the *pdm3* reciprocal hemizyosity test crosses. (K) Quantification of A6 segment pigment intensity of the female hybrids. *p* values were calculated by Student's t-test (\*\*\*\*:  $p < 0.0001$ ; \*\*\*:  $p < 0.001$ ; \*\*:  $p < 0.01$ ; \*:  $p < 0.05$ ; ns = not significant). In each panel showing abdominal phenotypes, the right image displays the magnified area outlined in the left image by black dashed lines. (L-V) Time course of Pdm3 expression, showing the third instar larval brain (L, M), and different time points of pupal development of the *D. yakuba* (N, Q, S, U), *D. santomea* (O, R, T, V) and *Abd-B* introgression (P) abdomen. In (N-V), the middle and bottom images show magnified regions of A5 and A6 body segments outlined in the top images in red and blue, respectively. Timepoint 1: 65-66 hAPF, Timepoint 2: 69-72 hAPF, Timepoint 3: 72-75 hAPF, Timepoint 4: 84-90 hAPF.

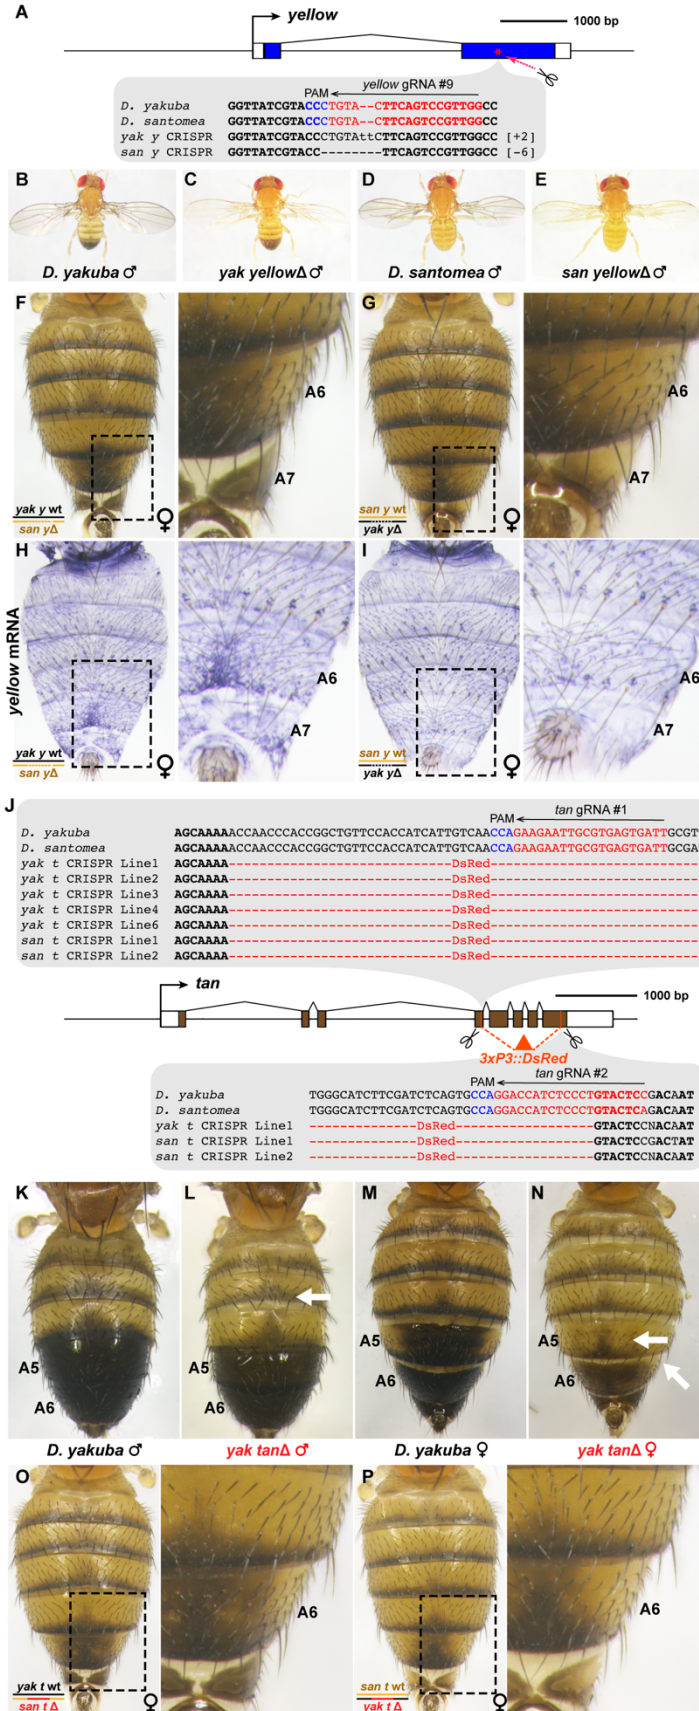



**Figure S5. Reciprocal hemizyosity tests for *yellow* and *tan* uncover phenotypic contributions to *D. santomea* pigmentation. Related to Figure 5.** (A) Schematic of the *yellow* locus, showing the location of a guide RNA used to generate the CRISPR/Cas9 mutants (red star). Sequence alignment displays confirmation of non-homologous end joining events. (B-E) Phenotypes of *yellow* mutations induced in *D. yakuba* (C) and *D. santomea* (E). (F-G) Phenotypes of the female hybrids from the *yellow* reciprocal hemizyosity test crosses. (H-I) *In situ* hybridization of female samples from reciprocal hemizyosity test crosses, showing the accumulation of *yellow* mRNA at a mid-late pupal stage (74 hAPF). (J) Schematic of the *tan* locus, showing the locations of guide RNAs used to replace exons with a *3xP3::RFP* cassette (orange triangle) to generate a null mutant. Alignments display sequence confirmation of the insertion. (K-N) Phenotypes of *D. yakuba tan* mutant males (L) and females (N), compared to wildtype *D. yakuba* (K, M). (O-P) Reciprocal hemizygote phenotypes of *tan* in females. (O) Female hemizygote bearing a wildtype *D. yakuba tan* allele. (P) Female hemizygote bearing a wildtype *D. santomea tan* allele. Hemizygote females with a functional *D. yakuba tan* allele (O) showed stronger pigmentation than hemizygote females with a functional *D. santomea* allele (P). In all multi-image panels, the images on the right side of each panel show magnified views of the regions outlined in the images to the left.

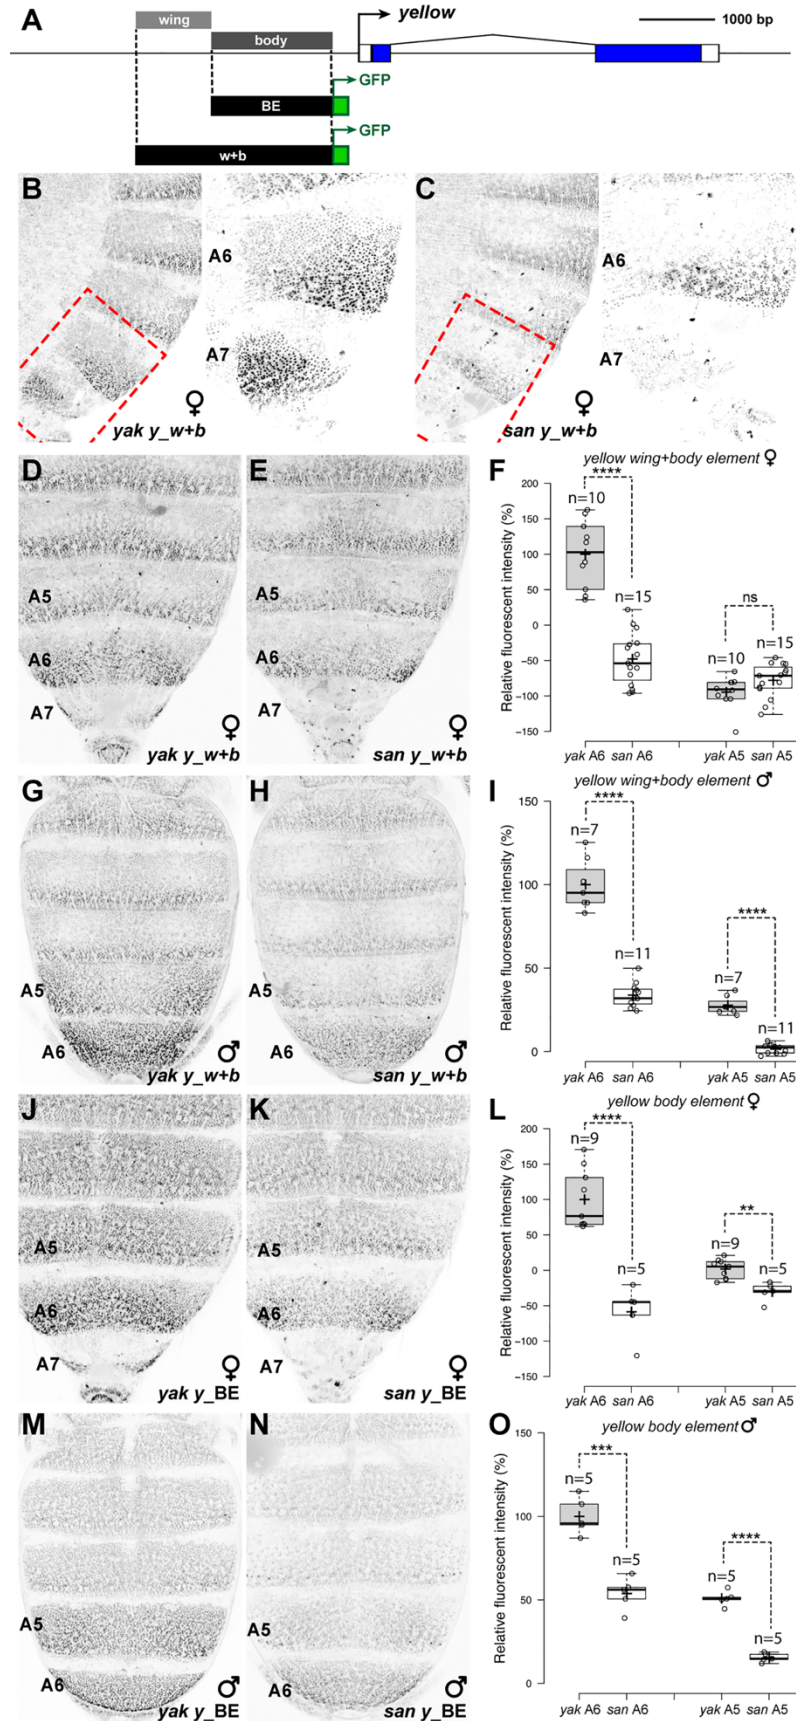

**Figure S6. Identification of cis-regulatory mutations in the *yellow* regulatory region.**

**Related to Figure 5.** (A) Schematic of the *yellow* locus, showing the positions of the wing and body enhancer elements upstream of the transcription start site and GFP reporter constructs containing either the body element (“BE”) or the wing+body element (“w+b”). (B-F) Comparison of *D. yakuba* (B, D) and *D. santomea* (C, E) *yellow* wing+body reporter activities in females at a late stage of pupal development (91 hAPF). Expression from the *D. santomea* w+b reporter was reduced in A6 and the small triangular A7 body segment. In (B, C), the right images show the magnified views of the regions outlined in images to the left. Both lateral (B, C), and dorsal (D, E) views are shown, and quantifications of A5 and A6 segment intensity are shown in (F). (G-I) Comparison of the *D. yakuba* (G) and *D. santomea* (H) *yellow* wing+body reporter activities in males at a late stage of pupal development. Boxplot in (I) shows quantification of A5 and A6 segment intensities. (J-O) Comparison of the *D. yakuba* (J, M) and *D. santomea* (K, N) *yellow* body element reporter in females (J, K) and males (M, N) at a late stage of pupal development is quantified in (L, O). This element drove similar differences in expression compared to the w+b element. *p* values were calculated by Student’s t-test (\*\*\*\*:  $p < 0.0001$ ; \*\*\*:  $p < 0.001$ ; \*\*:  $p < 0.01$ ; \*:  $p < 0.05$ ; ns = not significant).

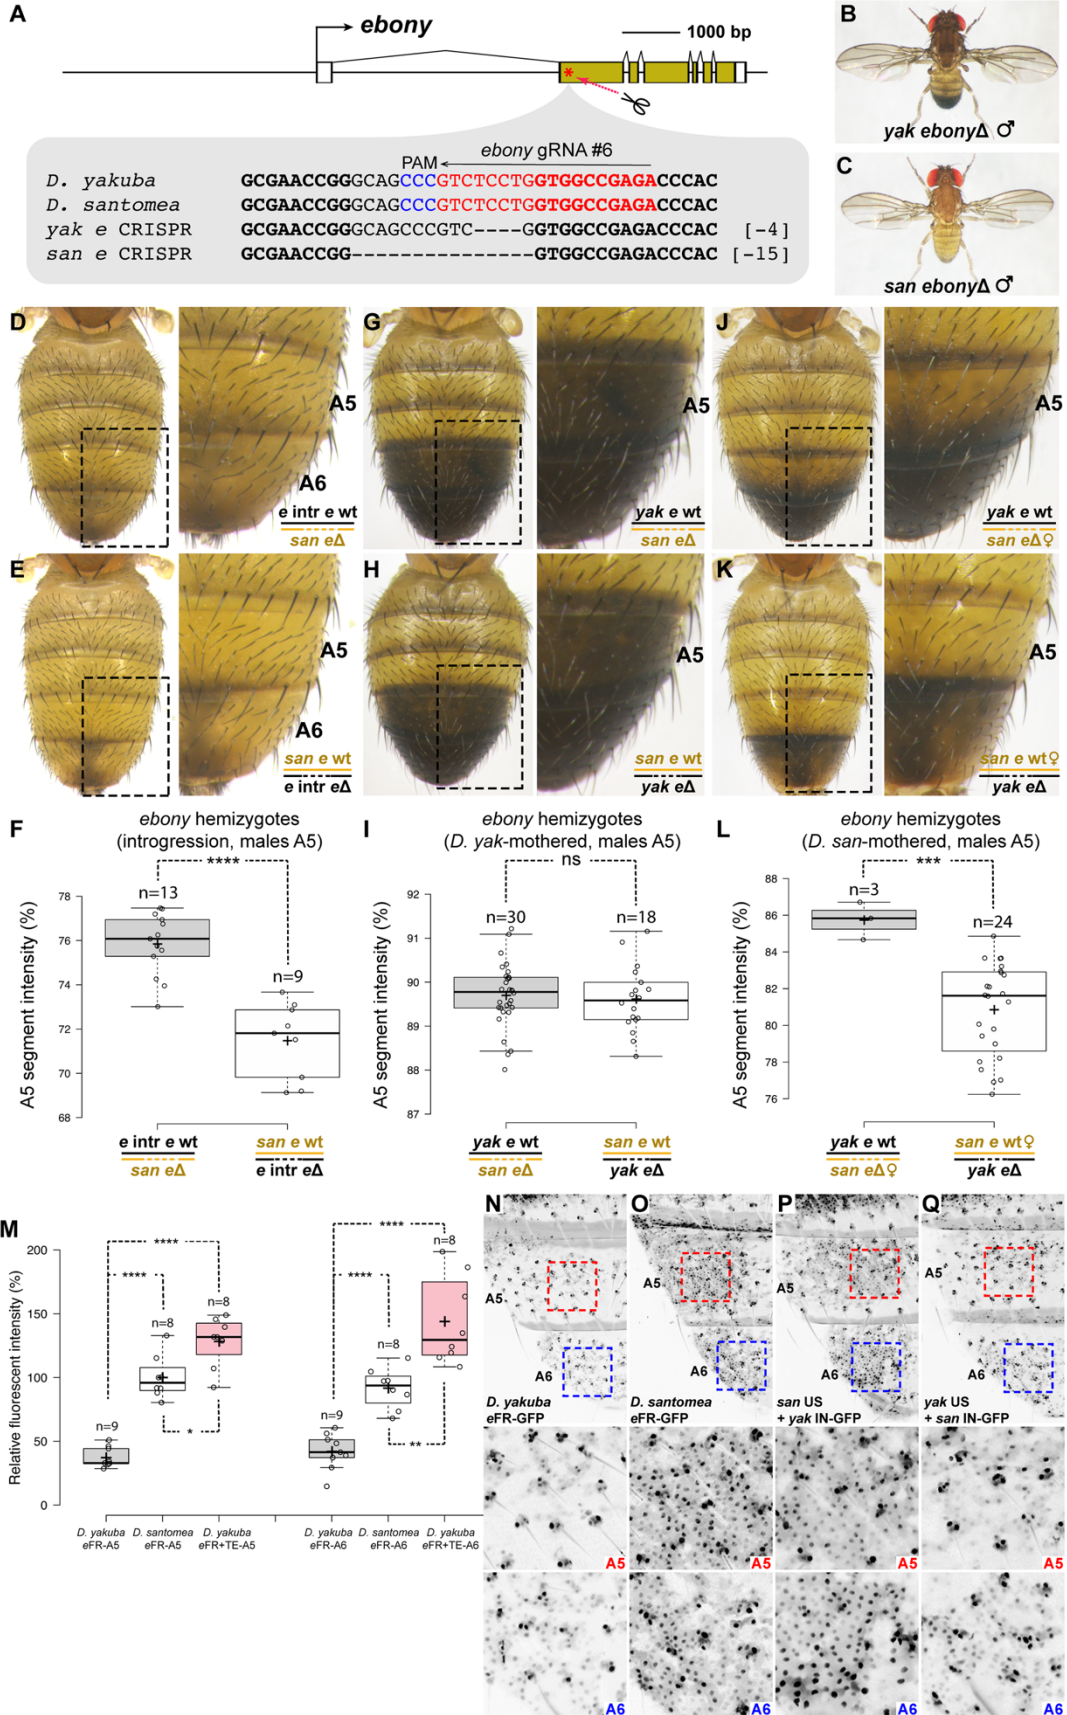

**Figure S7. Evolution at *ebony* contributed to the pigmentation pattern of *D. santomea*.**

**Related to Figure 6.** (A) Schematic of the *ebony* locus, indicating the location of a sgRNA for CRISPR/Cas9 mutagenesis by non-homologous end joining. Alignment shows sequence confirmation of edits. (B, C) Phenotypes of CRISPR/Cas9 induced *ebony* mutations in *D. yakuba* (B) and *D. santomea* (C). (D-F) Phenotypes of reciprocal hemizyosity test for *ebony* carried out in male hybrids of *D. santomea* and the *ebony* introgression line (which contains a *D. yakuba ebony* gene in a *D. santomea* background). (D) Male hemizygote bearing a wildtype copy of *ebony* from *D. yakuba* carried on the introgressed genome fragment. (E) Male hemizygote bearing a wildtype copy of the *D. santomea ebony* gene. (F) Quantification of A5 segment intensity of *ebony* introgression x *D. santomea* hemizygotes. Note that these are the same samples for which A6 segment intensity is quantified in Figure 4D. (G-I) Reciprocal hemizyosity test for *ebony* in *D. yakuba* mothered hybrids. (G) *D. yakuba* mothered hybrid bearing a wildtype copy of *ebony* from *D. yakuba*. (H) *D. yakuba* mothered hybrid bearing a wildtype copy of *ebony* from *D. santomea*. (I) Quantification of A5 segment intensity in hybrids reveals that male reciprocal hemizygotes from *D. yakuba* mothers with alternative *ebony* alleles produced similarly pigmented A5 and A6 segments. (J-L) Phenotypes of male hybrids from the *D. santomea*-mothered *ebony* reciprocal hemizyosity test crosses. (J) *D. santomea* mothered hybrid bearing an intact *D. yakuba ebony* allele. (K) *D. santomea*-mothered hybrid bearing an intact *D. santomea ebony* allele. (L) Box plot of A5 segment intensities of *D. santomea*-mothered progeny revealed that in this background hemizygotes with a *D. yakuba* functional *ebony* allele displayed darker A5 body segments than hemizygotes with a functional *D. santomea ebony* allele. The combined effects of the *D. santomea ebony* and X chromosome produce male A5 segments that are two-fold lighter than would be expected if *ebony* and alleles on the X chromosome were to act strictly additively (4.8 units,  $P < 3e-5$  by ANOVA). In each panel showing abdomen phenotypes, the right image displays the magnified region outlined in the left image. (M-Q) Analysis of *ebony* full regulatory GFP reporters. (M) Quantification of A5 and A6 segment fluorescent intensities of *D. yakuba eFR-GFP*, *D. santomea eFR-GFP*, and the *D. yakuba eFR-GFP* with the *D. santomea* helitron element inserted (*D. yakuba eFR-GFP+TE*). (N-Q) *ebony* reporters localize changes to its 5' regulatory region. (N) Activity of *D. yakuba eFR-GFP* reporter. (O) Activity of *D. santomea eFR-GFP* reporter. (P) Chimeric reporter containing the upstream region from *D. santomea* fused to the intron of *D. yakuba*. (Q) Chimeric reporter containing the upstream region of *D. yakuba* fused to the intron of *D. santomea*. The chimeric construct bearing the 5' region of *D. santomea* drove heightened expression in the A5 and A6 segments (P). The chimera containing the *D. yakuba* 5' regulatory region drove background epithelial expression (Q), showing only upregulation in the bristles, which is driven by a separate enhancer element of the *ebony* 5' regulatory region. From (N) to (Q), the middle and bottom images show the magnified regions outlined in the top images by red (A5) and blue (A6) dashed lines. All *p* values were calculated by Student's t-test (\*\*\*\*:  $p < 0.0001$ ; \*\*\*:  $p < 0.001$ ; \*\*:  $p < 0.01$ ; \*:  $p < 0.05$ ; ns = not significant).

| Protein  | <i>D. san</i><br>nsam | <i>D. yak</i><br>nsam | <i>D. san</i><br>fixed | <i>D. yak</i><br>fixed | <i>D. san</i><br>poly | <i>D. yak</i><br>poly | Shared<br>poly |
|----------|-----------------------|-----------------------|------------------------|------------------------|-----------------------|-----------------------|----------------|
| Yellow   | 32                    | 57                    | 0                      | 0                      | 1                     | 3                     | 1              |
| Tan      | 32                    | 58                    | 0                      | 0                      | 2                     | 6                     | 0              |
| Ebony    | 32                    | 59                    | 1                      | 2                      | 3                     | 8                     | 0              |
| Abd-B-PB | 32                    | 61                    | 0                      | 0                      | 6                     | 4                     | 0              |
| Abd-B-PF | 32                    | 61                    | 0                      | 0                      | 2                     | 2                     | 0              |
| Pdm3     | 32                    | 62                    | 0                      | 0                      | 13                    | 31                    | 2              |

**Table S1. Summary of amino-acid altering differences between *D. yakuba* and *D. santomea* populations. Related to STAR Methods. *D. san*=*D. santomea*; *D. yak*=*D. yakuba*; nsam=sample size; fixed=fixed difference between species samples; poly=polymorphic within species; Shared=polymorphisms shared by both species.**

| Tested Gene           | Forward Primer                                     | Reverse Primer                                      | Notes                                                                                                       |
|-----------------------|----------------------------------------------------|-----------------------------------------------------|-------------------------------------------------------------------------------------------------------------|
| <i>yak/san yellow</i> | TTYGCCGTMTCCACGA<br>GGAT                           | taatacgactcactataggAKGC<br>CGTTGTGCTGGTTGAA         | A T7 promoter was appended to the reverse primer.                                                           |
| <i>yak/san ebony</i>  | AGCTATCGCCAGATGAA<br>CGAG                          | taatacgactcactataggGTCT<br>TGAAAACGCTCACCGTC<br>TC  | A T7 promoter was appended to the reverse primer.                                                           |
| <i>yak/san tan</i>    | GACGGAGACCCTGAAT<br>CACTAC                         | taatacgactcactataggGTTT<br>TGCCGCTGCGCAAGAG<br>CTC  | A T7 promoter was appended to the reverse primer.                                                           |
| <i>GFP</i>            | atttagtgacactatagaCCAC<br>CATGGTGAGCAAGGGC<br>GAGG | taatacgactcactataggTTAG<br>CGTCTTCGTTCACTGCT<br>GCG | A T7 promoter was appended to the reverse primer, while an SP6 promoter was appended to the forward primer. |

**Table S2. Primers for *in situ* hybridization. Related to STAR Methods.** Lowercase letters indicate promoters appended for *in vitro* transcription.

| Construct                               | Forward Primer                                                         | Reverse Primer                                                       | Restriction Sites          |
|-----------------------------------------|------------------------------------------------------------------------|----------------------------------------------------------------------|----------------------------|
| <i>yak/san</i> IAB5 core element        | ATAGATCTGGTCTAGAGCCCCGGG<br>CGAATTCGCCggcgcgccCAATTGCC<br>CAGGTATCTCCA | GGATCCGCTAGCTTCCGCGGTTG<br>CGATCGCTTcctgcaggTTCCACTTC<br>CGAACTTGGTC | <i>Asc</i> // <i>Sbf</i> I |
| upstream region of <i>yak/san</i> eFR   | TTCCGggcgcgccGAGCAACCCTTTT<br>TATAAGCGATG                              | TTGCCcctgcaggCCTGCTCTTAMAG<br>CCSCTGCAATTAC                          | <i>Asc</i> // <i>Sbf</i> I |
| intron region of <i>yak/san</i> eFR     | CATCAATGTATCTTAactagtCTGCG<br>AGCGCCGTTTACAAGTACA                      | CACACTTATTACGTGactagtAGCTG<br>CTGCTCCTCGAAGATGCGG                    | <i>Spe</i> I               |
| <i>yak/san</i> yellow wing+body element | TTCCGggcgcgccCTCCTCCATGGTG<br>GTGGAACTA                                | TTGCCcctgcaggACGACTGGTGGCC<br>ATAATAAGTC                             | <i>Asc</i> // <i>Sbf</i> I |
| <i>yak/san</i> yellow body element      | TTCCGggcgcgccGCTTTCCGCCAA<br>GTTGAAGTG                                 | TTGCCcctgcaggCGGGTAATCAGGT<br>GGCTTATGC                              | <i>Asc</i> // <i>Sbf</i> I |

**Table S3. Primers for Cloning Transgenic GFP Reporter Constructs. Related to STAR Methods.** Lowercase letters indicate restriction sites added to primers for cloning purposes.



| Name                         | Primer                                                         | Notes                                                                                                                                       |
|------------------------------|----------------------------------------------------------------|---------------------------------------------------------------------------------------------------------------------------------------------|
| <i>iab-5-F-Asc I</i>         | GGGCGAATTCGCCggcgcgccCRTT<br>TTCCGTTTTATTGCGA                  | For amplifying <i>yak/san iab-5</i> fragment 3                                                                                              |
| <i>iab-5-R-Sbf I</i>         | TTGCGATCGCTTcctgcaggCGGCC<br>GATGAAAGCAGTCCGCCAG               | For amplifying <i>yak/san iab-5</i> fragment 1                                                                                              |
| <i>yak-iab-5-int-F3</i>      | CATGCTGCCATATTGCCAGAAC                                         | For amplifying <i>yak iab-5</i> fragment 1                                                                                                  |
| <i>yak-iab-5-int-R3</i>      | GTTCTGGCAATATGGCAGCATG                                         | For amplifying <i>yak iab-5</i> fragment 2                                                                                                  |
| <i>iab-5-whole MidF</i>      | GATGAGATTCAAGTGGCTGCTTT<br>C                                   | For amplifying <i>yak/san iab-5</i> fragment 2                                                                                              |
| <i>iab-5-whole MidR</i>      | GAAAGCAGCCACTTGAATCTCAT<br>C                                   | For amplifying <i>yak/san iab-5</i> fragment 3                                                                                              |
| <i>san-iab-5-intF6</i>       | GTCAATTAGCTGGTGCCAGTGTG                                        | For amplifying <i>san iab-5</i> fragment 1                                                                                                  |
| <i>san-iab-5-intR6</i>       | CACACTGGCACCAGCTAATTGAC                                        | For amplifying <i>san iab-5</i> fragment 2                                                                                                  |
| <i>sanEndSeqR1</i>           | CTGACGAAATTCCGACGGGAG                                          | For amplifying <i>san iab-5</i> pre-fragment 1                                                                                              |
| <i>yaksan-iab-5-int-F5</i>   | GTCTTCCATGTCTACGCCTGTTTG                                       | For amplifying <i>san iab-5</i> pre-fragment 1                                                                                              |
| YSebUS-chim-F                | CTAGAGCCCGGGCGAATTCGCCg<br>gcgcgccGATAAGGATTAGTWATAT<br>ATGRRC | External forward primer for overlap extension PCR to clone <i>yak eFR+TE-GFP</i> construct upstream region (Restriction site <i>Asc I</i> ) |
| YSebUS-chim-R                | TCCGCGGTTGCGATCGCTTcctgca<br>ggCCTGCTCTTACAGCCGCTGCA<br>ATTAC  | External reverse primer for overlap extension PCR to clone <i>yak eFR+TE-GFP</i> construct upstream region (Restriction site <i>Sbf I</i> ) |
| <i>yaksan-chim-hltr-F1</i>   | GCGCTATTAAGGTGTACTTGCT<br>CG                                   | Internal primer for overlap extension PCR to clone <i>yak eFR+TE-GFP</i> construct upstream region                                          |
| <i>yaksan-chim-hltr-R1</i>   | CGAGCAAGTACACCTTTAATAGC<br>GC                                  | Internal primer for overlap extension PCR to clone <i>yak eFR+TE-GFP</i> construct upstream region                                          |
| <i>yaksan-chim-hltr-F2-3</i> | CAATTGAAATGATAAATCCGCTCA<br>TTATTCTTGAACCTCAC                  | Internal primer for overlap extension PCR to clone <i>yak eFR+TE-GFP</i> construct upstream region                                          |
| <i>yaksan-chim-hltr-R2-3</i> | GTGAGTTCAAGAATAATGAGCGG<br>ATTTATCATTCAATTG                    | Internal primer for overlap extension PCR to clone <i>yak eFR+TE-GFP</i> construct upstream region                                          |

**Table S4. Primers for Cloning Transgenic GFP Reporter Constructs by Overlap Extension PCR or Infusion Cloning. Related to STAR Methods.**

|                   |                                                                                     |
|-------------------|-------------------------------------------------------------------------------------|
| <i>ebony 5</i>    | GAAATTAATACGACTCACTATAGG <u>TTCGCCCGCTCGTTCATCGTTTTAGAGCT</u><br>AGAAATAGC          |
| <i>ebony 6</i>    | GAAATTAATACGACTCACTATAGG <u>TCTCGGCCACCAGGAGACGTTTTAGAGCT</u><br>AGAAATAGC          |
| IAB5 1            | GAAATTAATACGACTCACTATAGG <u>TGCGTTTCCATTTCCCTGTTTTAGAGCTA</u><br>GAAATAGC           |
| IAB5 2            | GAAATTAATACGACTCACTATAGG <u>ATCAATCGGTTTATTGATGTTTTAGAGCTA</u><br>GAAATAGC          |
| <i>pdm3-san 1</i> | GAAATTAATACGACTCACTATAGG <u>GAGTTCTACAAGAACCTGGGTTTTAGAGCT</u><br>AGAAATAGC         |
| <i>pdm3-san 2</i> | GAAATTAATACGACTCACTATAG <u>CGTTTGCCGCCCATCTGAAGTTTTAGAGCT</u><br>AGAAATAGC          |
| <i>pdm3-yak 1</i> | GAAATTAATACGACTCACTATAG <u>ATGAAATGGAGATCACAGAGTTTTAGAGCT</u><br>AGAAATAGC          |
| <i>pdm3-yak 4</i> | GAAATTAATACGACTCACTATAG <u>CGTGATCCTTGTTGTCAAGTTTTAGAGCT</u><br>AGAAATAGC           |
| <i>yellow 2</i>   | GAAATTAATACGACTCACTATAGG <u>TTTTGGACACTGGAACCGTTTTAGAGCT</u><br>AGAAATAGC           |
| <i>yellow 9</i>   | GAAATTAATACGACTCACTATAGG <u>CCAACGGACTGAAGTACAGTTTTAGAGCT</u><br>AGAAATAGC          |
| <i>tan 1</i>      | GAAATTAATACGACTCACTATAGG <u>AATCACTCACGCAATTCTTCGTTTTAGAGC</u><br>TAGAAATAGC        |
| <i>tan 2</i>      | GAAATTAATACGACTCACTATAGG <u>GGGAGTACAGGGAGATGGTCCGTTTTAGA</u><br>GCTAGAAATAGC       |
| sgRNAR            | AAAAGCACCGACTCGGTGCCACTTTTTCAAGTTGATAACGGACTAGCCTTATT<br>TTAACTTGCTATTTCTAGCTCTAAAC |

**Table S5. Primers for generation of gRNAs. Related to STAR Methods.** gRNA target sequences are underlined. gRNA-specific primers were combined with sgRNAR for PCR and the cleaned amplicon was used for in vitro transcription.

|                               |                           |
|-------------------------------|---------------------------|
| IAB5 left arm forward         | CTACACAAAAACACGCAAGGC     |
| IAB5 left arm reverse         | ACCGCCTCTAAACCACGACTC     |
| IAB5 right arm forward        | CCTTTTGCATGGCAGAGTTCAAC   |
| IAB5 right arm reverse        | GATTCTTTTCATGGGGCGAAACAA  |
| <i>pdm3</i> left arm forward  | GATCCTTCTGCGAACTGGGT      |
| <i>pdm3</i> left arm reverse  | GAACTCCAGCTCCTTGACGT      |
| <i>pdm3</i> right arm forward | GAAAGCCAAACAGCAGCACA      |
| <i>pdm3</i> right arm reverse | ACACACACACTCACCTTGGG      |
| <i>tan</i> left arm forward   | GAATGTTTAAGTAAAGACGCGATGG |
| <i>tan</i> left arm reverse   | GCAGGGCAAGTACAACGTCAAG    |
| <i>tan</i> right arm forward  | GGCTTCGATAAGATCAGAAAGTTC  |
| <i>tan</i> right arm reverse  | TGACCCACTACAGAACAGCC      |

**Table S6. Genomic target sequences for primers used to construct homologous recombination plasmids. Related to STAR Methods.** Primers were extended 3' with sequences specific for the plasmids used in Gibson assembly.

### **Supplemental References**

- S1. Andolfatto, P., Davison, D., Erezyilmaz, D., Hu, T. T., Mast, J., Sunayama-Morita, T., and Stern, D. L. (2011). Multiplexed shotgun genotyping for rapid and efficient genetic mapping. *Genome Res.* *21*, 610–617.
- S2. Carbone, M. A., Llopart, A., DeAngelis, M., Coyne, J. A., and Mackay, T. F. C. (2005). Quantitative trait loci affecting the difference in pigmentation between *Drosophila yakuba* and *D. santomea*. *Genetics* *171*, 211–225.
